# Supplementary figures and images for: A RXR Ligand 6-OH-11-O-Hydroxyphenanthrene with Antitumour Properties Enhances (−)-Epigallocatechin-3-gallate Activity in Three Human Breast Carcinoma Cell Lines
Source: Hindawi journal article supplement (doi:10.1155/2014/853086), 2014-01-01

A

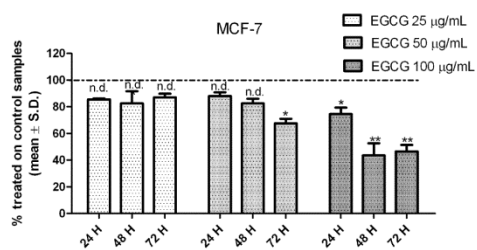

B

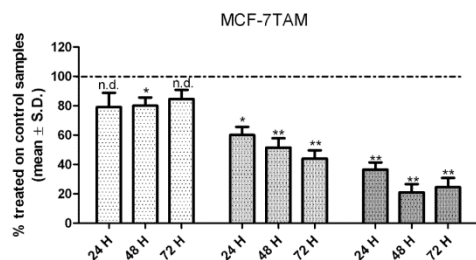

C

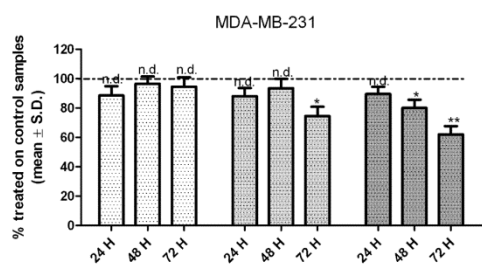

D

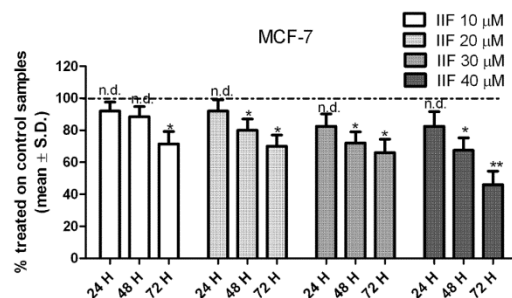

E

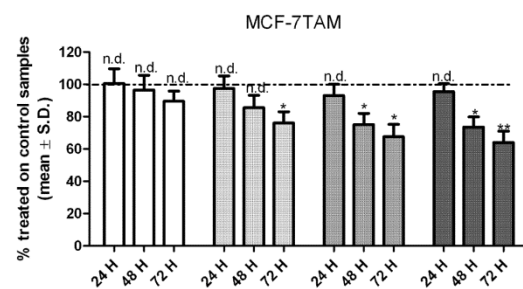

F

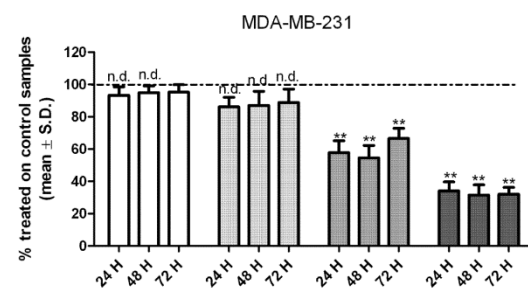

Supplemental Figure 1

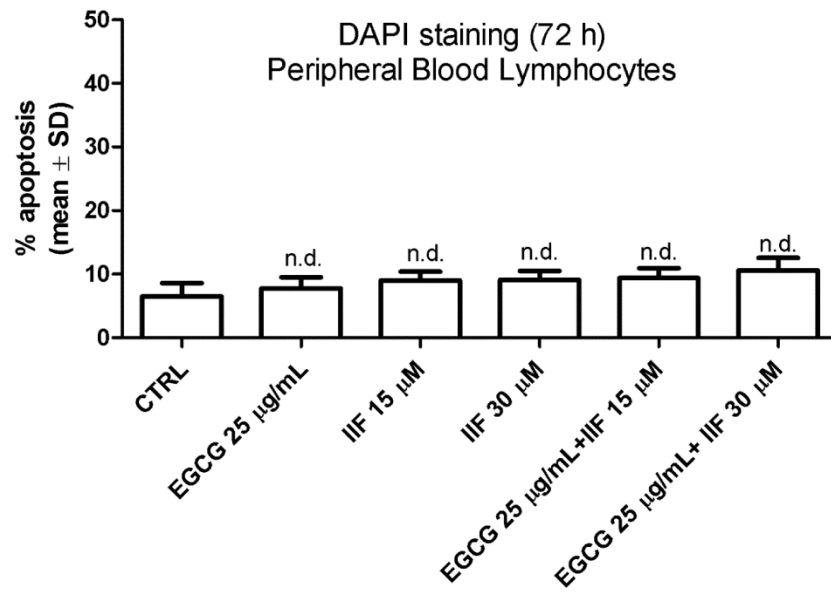

Supplemental Figure 2

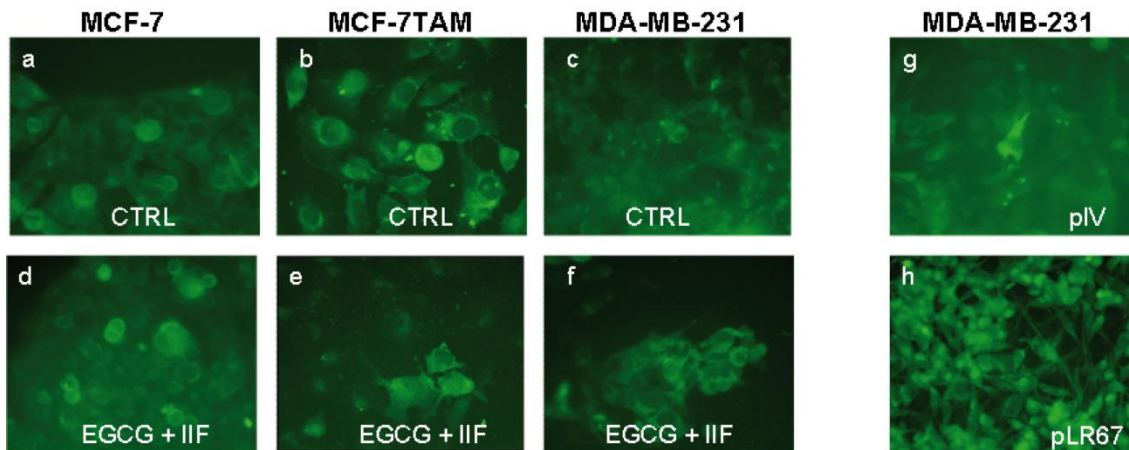

Supplemental Figure 3

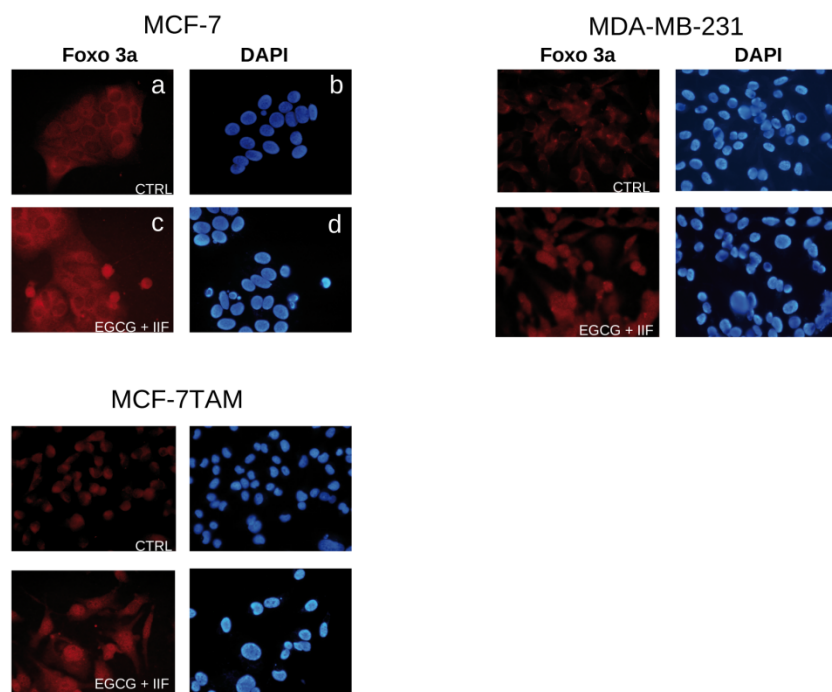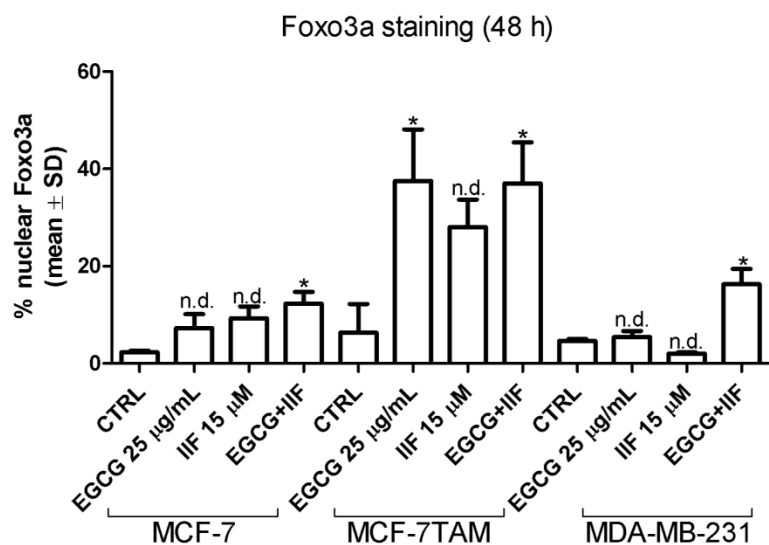

Supplemental Figure 4

Supplement: f1 [file 853086.f1.zip]
